# Supplementary material
Source: PubMed Central journal article supplement (PMC2613700)
Supplement: pp.108.129536_1.pdf [file pp.108.129536_1.pdf]

70-15

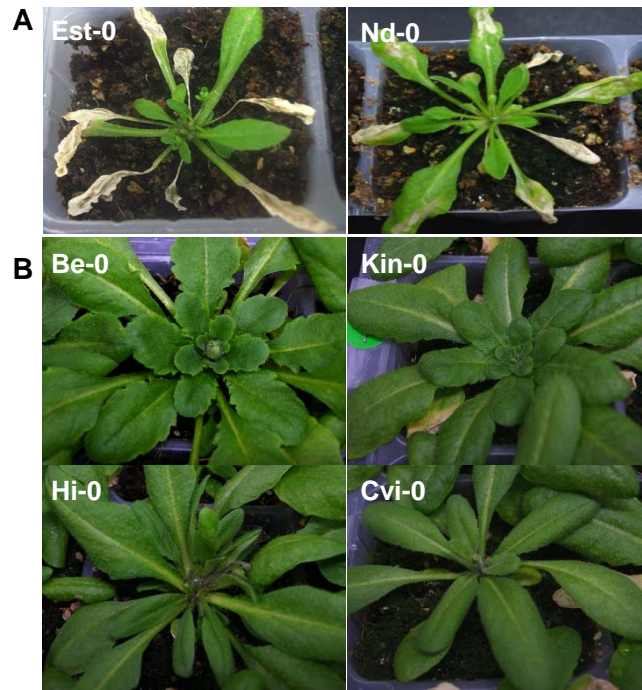

**Supplemental Figure 1.** Responses of six ecotypes to 70-15 at 6 dpi. (A) Severe symptoms were observed on Est-0 (DS=4) and Nd-0 (DS=2.5). (B) These four ecotypes did not exhibit any visible symptom and are considered resistant to 70-15.
