# Supplementary material
Source: PubMed Central journal article supplement (PMC2613700)
Supplement: pp.108.129536_2.pdf [file pp.108.129536_2.pdf]

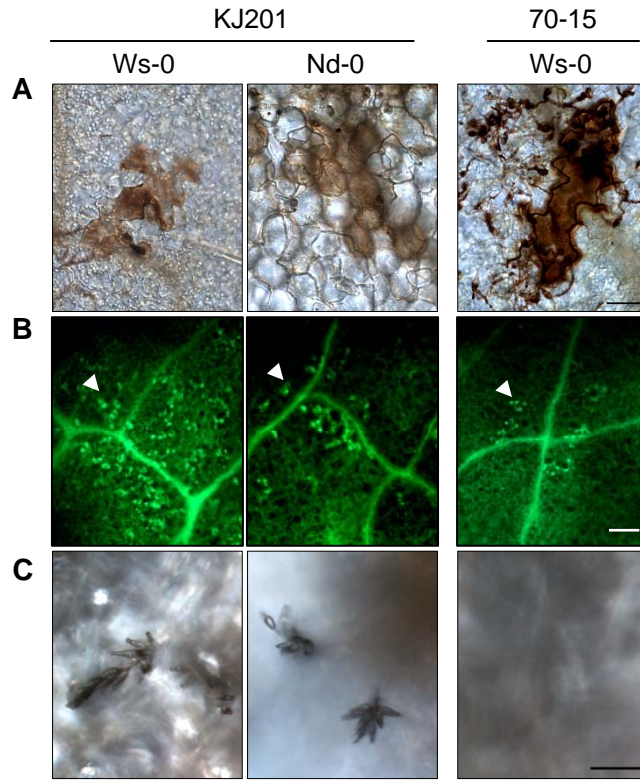

**Supplemental Figure 2.** Cellular responses of *A. thaliana* to infection by KJ201 and 70-15 at 3 dpi. Three 5  $\mu$ l drops of a fungal spore suspension ( $5 \times 10^5$  spores/ml) were placed on the leaves of 28- to 30-day-old plants of ecotypes Ws-0 and Nd-0. (A)  $H_2O_2$  accumulation was detected in leaves inoculated with KJ201 and 70-15 using 3,3'-diaminobenzidine (DAB) staining. (B) Aniline blue fluorochrome staining of the leaves revealed callose accumulation (marked by arrowheads) around the penetration sites. Bar = 100  $\mu$ m. (C) Asexual reproduction of *M. oryzae* on infected leaves. Bar = 50  $\mu$ m.
