# Supplementary material
Source: PubMed Central journal article supplement (PMC2613700)
Supplement: pp.108.129536_3.pdf [file pp.108.129536_3.pdf]

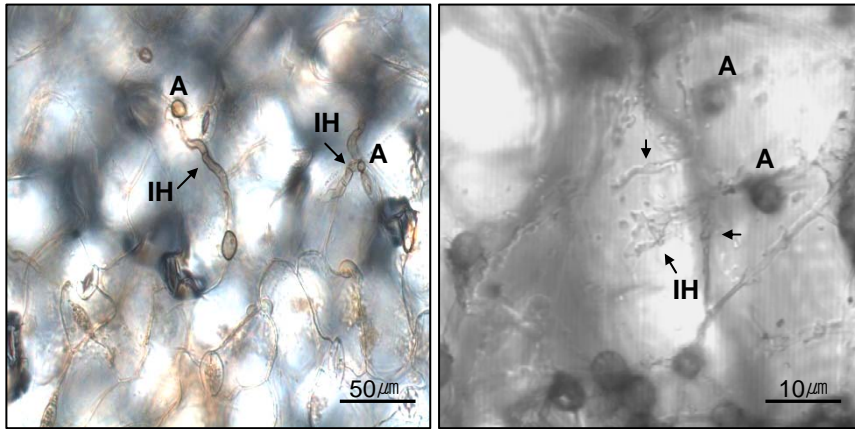

**Supplemental Figure 3.** Microscopic observation of fungal structures *in planta* using trypan blue staining. Leaf of Col-0 infected with KJ201 shows infectious hyphae (IH) and appressoria (A) at 3 dpi.
