# Supplementary material
Source: PubMed Central journal article supplement (PMC2613700)
Supplement: pp.108.129536_4.pdf [file pp.108.129536_4.pdf]

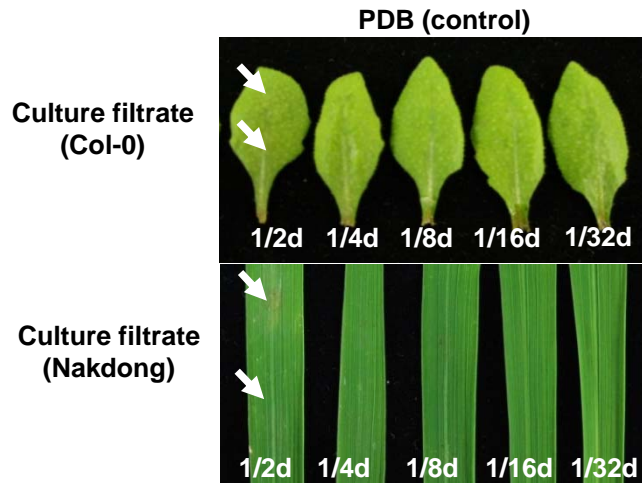

**Supplemental Figure 4.** Treatment of plants with a control extract from PD broth. PD broth was processed via the protocol used to prepare CF and was applied to rice and *A. thaliana* plants.
