# Supplementary material
Source: PubMed Central journal article supplement (PMC2613700)
Supplement: pp.108.129536_5.pdf [file pp.108.129536_5.pdf]

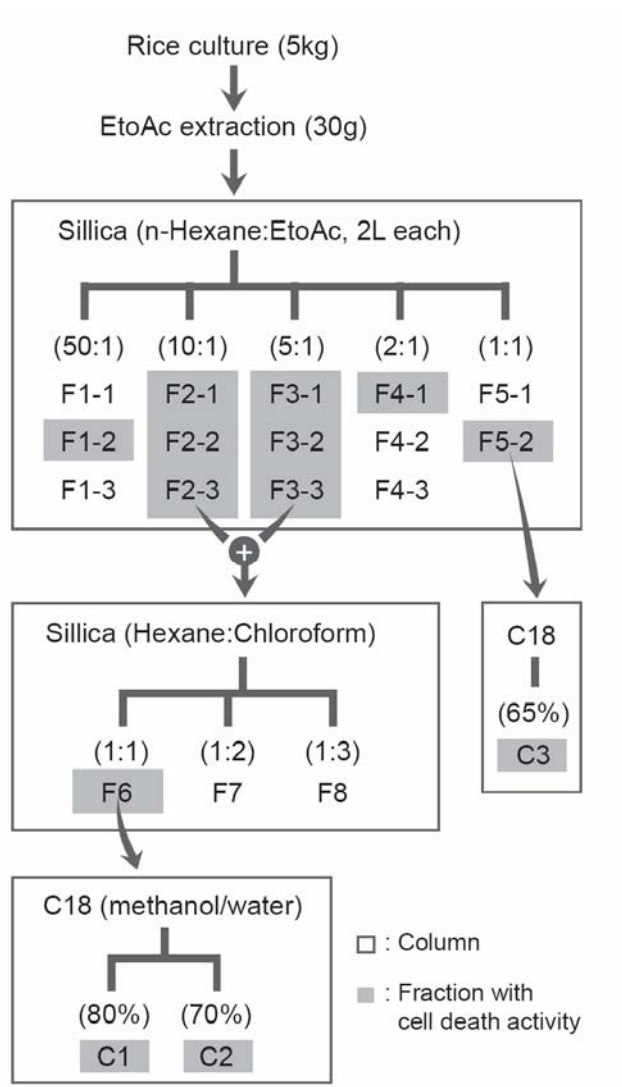

**Supplemental Figure 5.** Schematic diagram summarizing the steps involved in purifying the phytotoxic compounds..
