# Supplementary material
Source: PubMed Central journal article supplement (PMC2613700)
Supplement: pp.108.129536_6.pdf [file pp.108.129536_6.pdf]

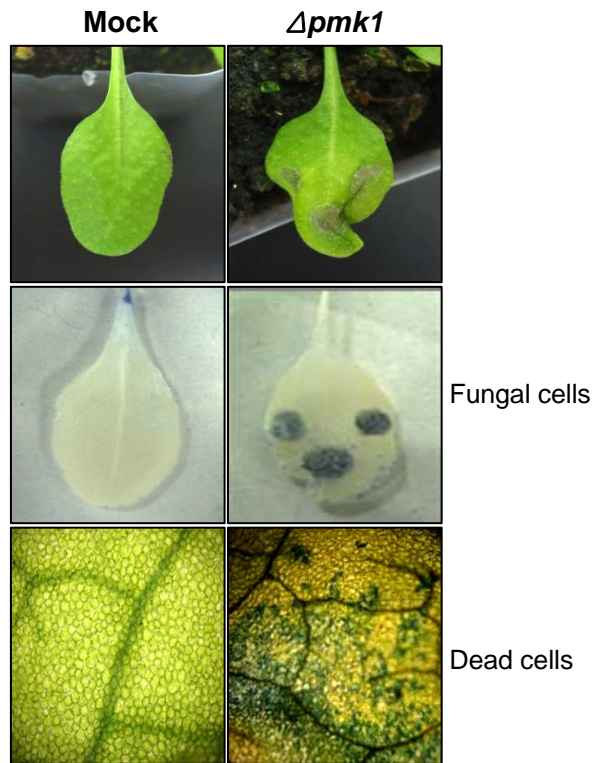

**Supplemental Figure 6.** Cellular responses of *A. thaliana* to  $\Delta pmk1$  infection. Leaves of ecotype Nd-0 infected with  $\Delta pmk1$  were stained with trypan blue (for fungal cells) and Evans blue (for dead cells).
