# Supplementary material
Source: PubMed Central journal article supplement (PMC2613700)
Supplement: pp.108.129536_7.pdf [file pp.108.129536_7.pdf]

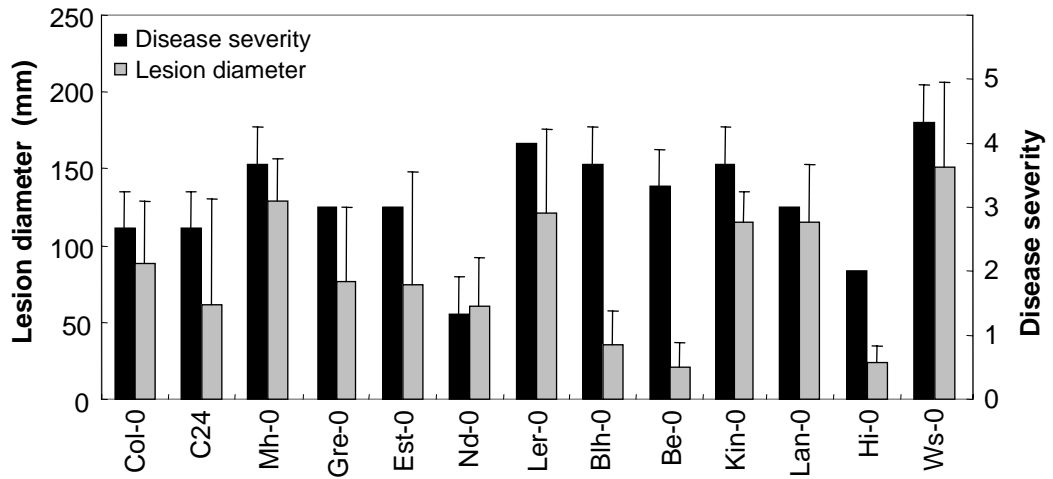

**Supplemental Figure 7.** Disease severity and lesion size caused by *M. oryzae* and a crude culture filtrate, respectively. Disease severity was recorded at 6 dpi; lesion size was measured 3 days after treatment.
