# Supplementary material
Source: PubMed Central journal article supplement (PMC2613700)
Supplement: pp.108.129536_8.pdf [file pp.108.129536_8.pdf]

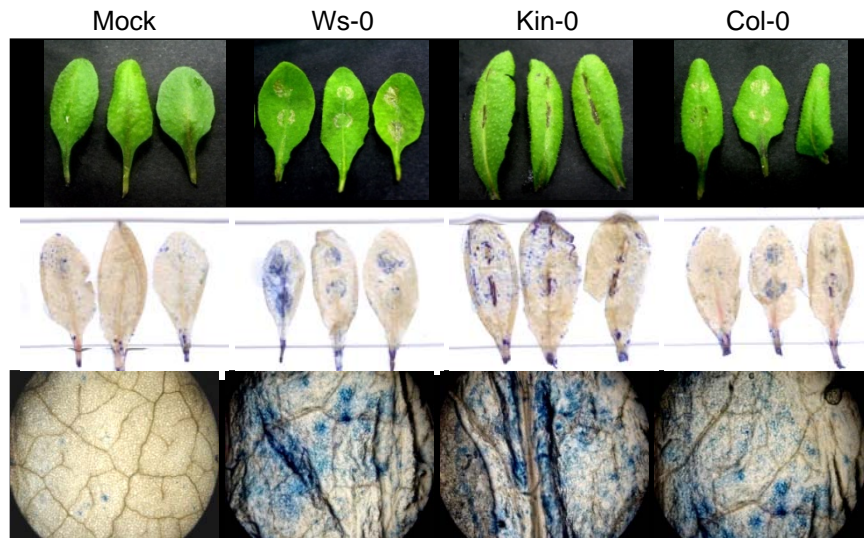

**Supplemental Figure 8.** Cellular responses of *A. thaliana* to a crude culture filtrate of *M. oryzae*. Control plants were treated with a solution of distilled water and acetone (50:50, mock). Leaves at 3 dpi are shown (first row). Cell death was detected by trypan blue staining (second row). Enlarged images of the stained cells through a light microscopy are shown (third row).
